# Supplementary material for: Enhancing the photoelectric performance of metal oxide semiconductors by introduction of dislocations
Source: Royal Society of Chemistry journal article supplement (doi:10.1039/d4ta03786c), 2024-01-01
Supplement: d4ta03786c1.pdf [file d4ta03786c1.pdf]

**Enhancing the photoelectric performance of metal oxide semiconductors by  
introduction of dislocations**

Haoyu Zhang<sup>a</sup>, Shuang Gao<sup>a</sup>, Hongyang Wang<sup>a</sup>, Fangping Zhuo<sup>b</sup>, Qaisar K. Muhammad<sup>b</sup>,  
Xufei Fang<sup>b,c</sup>, Jürgen Rödel<sup>b</sup>, Till Frömling<sup>b,\*</sup>, Qi Li<sup>a,\*</sup>

<sup>a</sup>*Key Laboratory of Advanced Technologies of Materials, Ministry of Education, School of  
Materials Science and Engineering, Southwest Jiaotong University, Chengdu 610031, China*

<sup>b</sup>*Department of Materials and Earth Sciences, Technical University of Darmstadt, 64287  
Darmstadt, Germany*

<sup>c</sup>*Institute for Applied Materials, Karlsruhe Institute of Technology, 76131 Karlsruhe, Germany*

\*Corresponding authors.

E-mail address: [till.froemling@mr.tu-darmstadt.de](mailto:till.froemling@mr.tu-darmstadt.de) (T. Frömling), [qiliuiuc@swjtu.edu.cn](mailto:qiliuiuc@swjtu.edu.cn) (Q.  
Li)

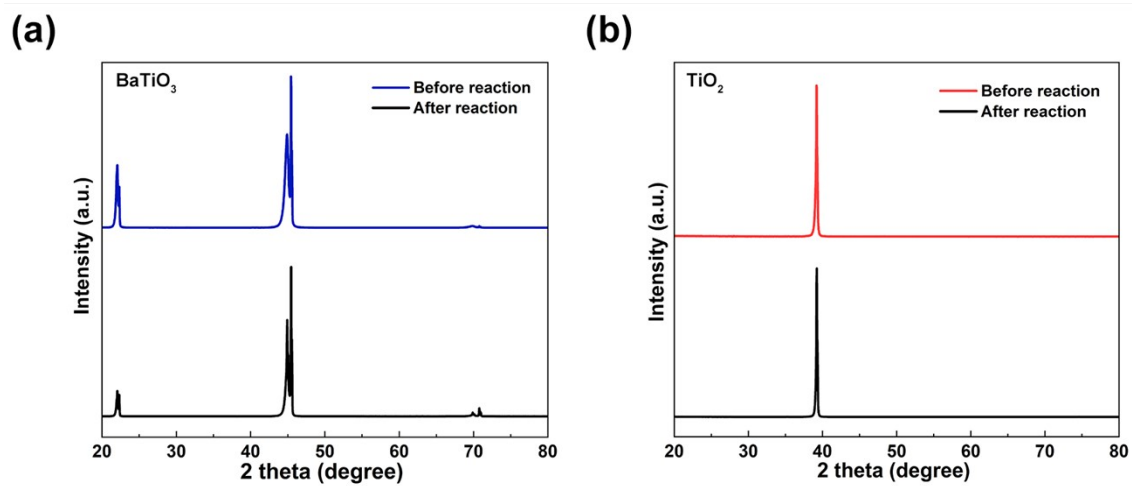

Figure S1. The XRD spectra comparison of a) BaTiO<sub>3</sub> (001) dislocation sample and b) TiO<sub>2</sub> (100) dislocation sample before and after reaction, respectively.

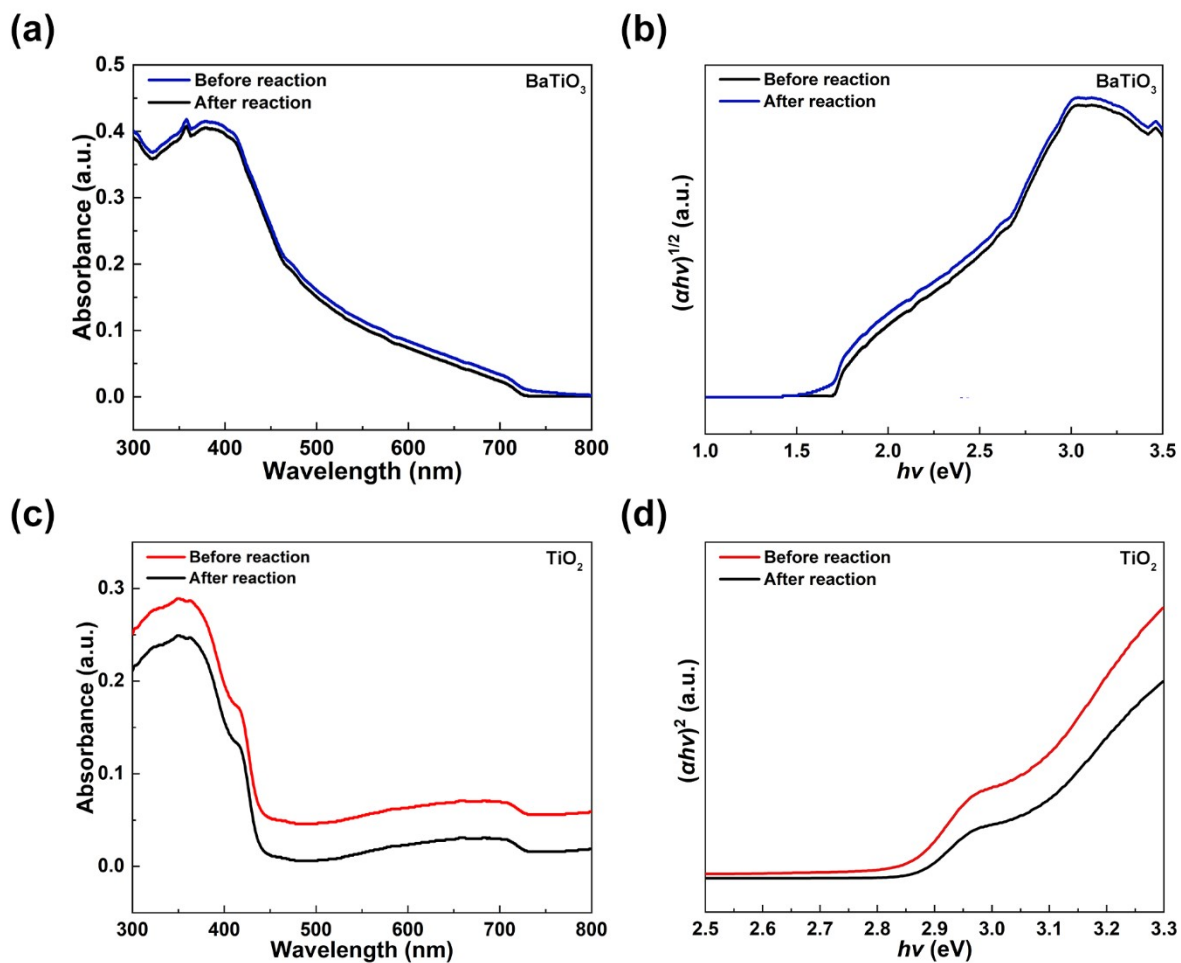

Figure S2. The UV-vis light absorbance spectra comparison of a) BaTiO<sub>3</sub> (001) dislocation sample and c) TiO<sub>2</sub> (100) dislocation sample and their corresponding bandgap Tauc plots of b) BaTiO<sub>3</sub> (001) dislocation sample and d) TiO<sub>2</sub> (100) dislocation sample before and after three consecutive runs, respectively.
